# Supplementary material for: Silencing of STE20-type kinase STK25 in human aortic endothelial and smooth muscle cells is atheroprotective
Source: PubMed Central journal article supplement (PMC9018782; doi:10.1038/s42003-022-03309-9), 2022-04-19
Supplement: 42003_2022_3309_MOESM2_ESM.pdf [file 42003_2022_3309_MOESM2_ESM.pdf]

Supplementary information

**Silencing of STE20-Type Kinase STK25 in Human Aortic Endothelial and Smooth Muscle Cells is Atheroprotective**

Cansby et al.

## Supplementary Figure 1

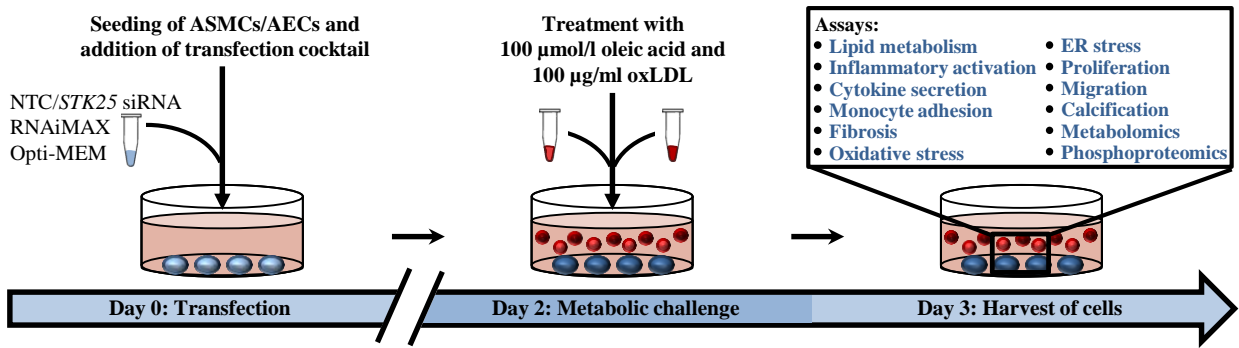

**Supplementary Fig. 1.** Schematic illustration of the study design.

## Supplementary Figure 2

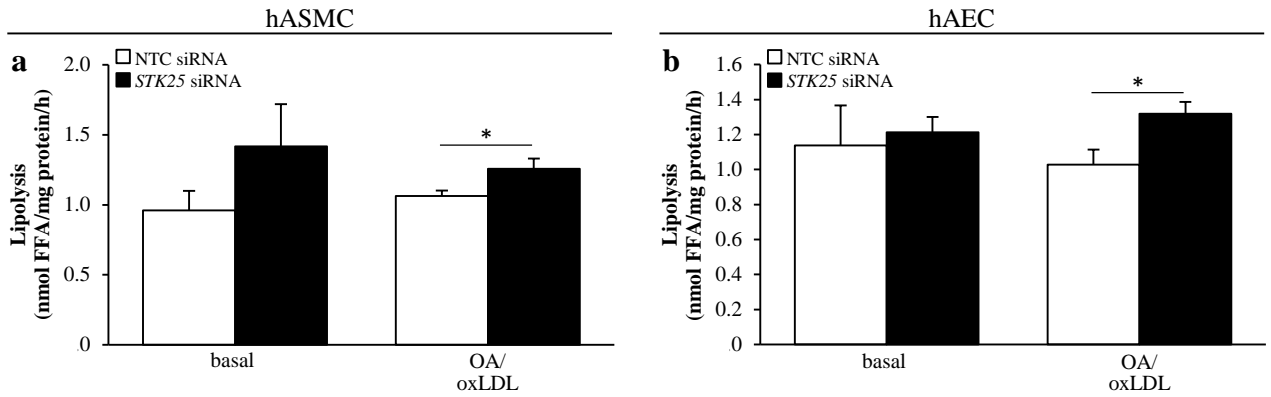

**Supplementary Fig. 2.** Silencing of STK25 increases lipolysis in human aortic endothelial and smooth muscle cells. hASMCs and hAECs were transfected with *STK25* siRNA or NTC siRNA. TAG hydrolase activity measured in hASMCs (a) and hAECs (b) using [<sup>3</sup>H]triolein as the substrate. Data are mean ± SEM from 6 wells per group. FFA, free fatty acid; OA, oleic acid. \**P*<0.05 for *STK25* siRNA vs. NTC siRNA

### Supplementary Figure 3

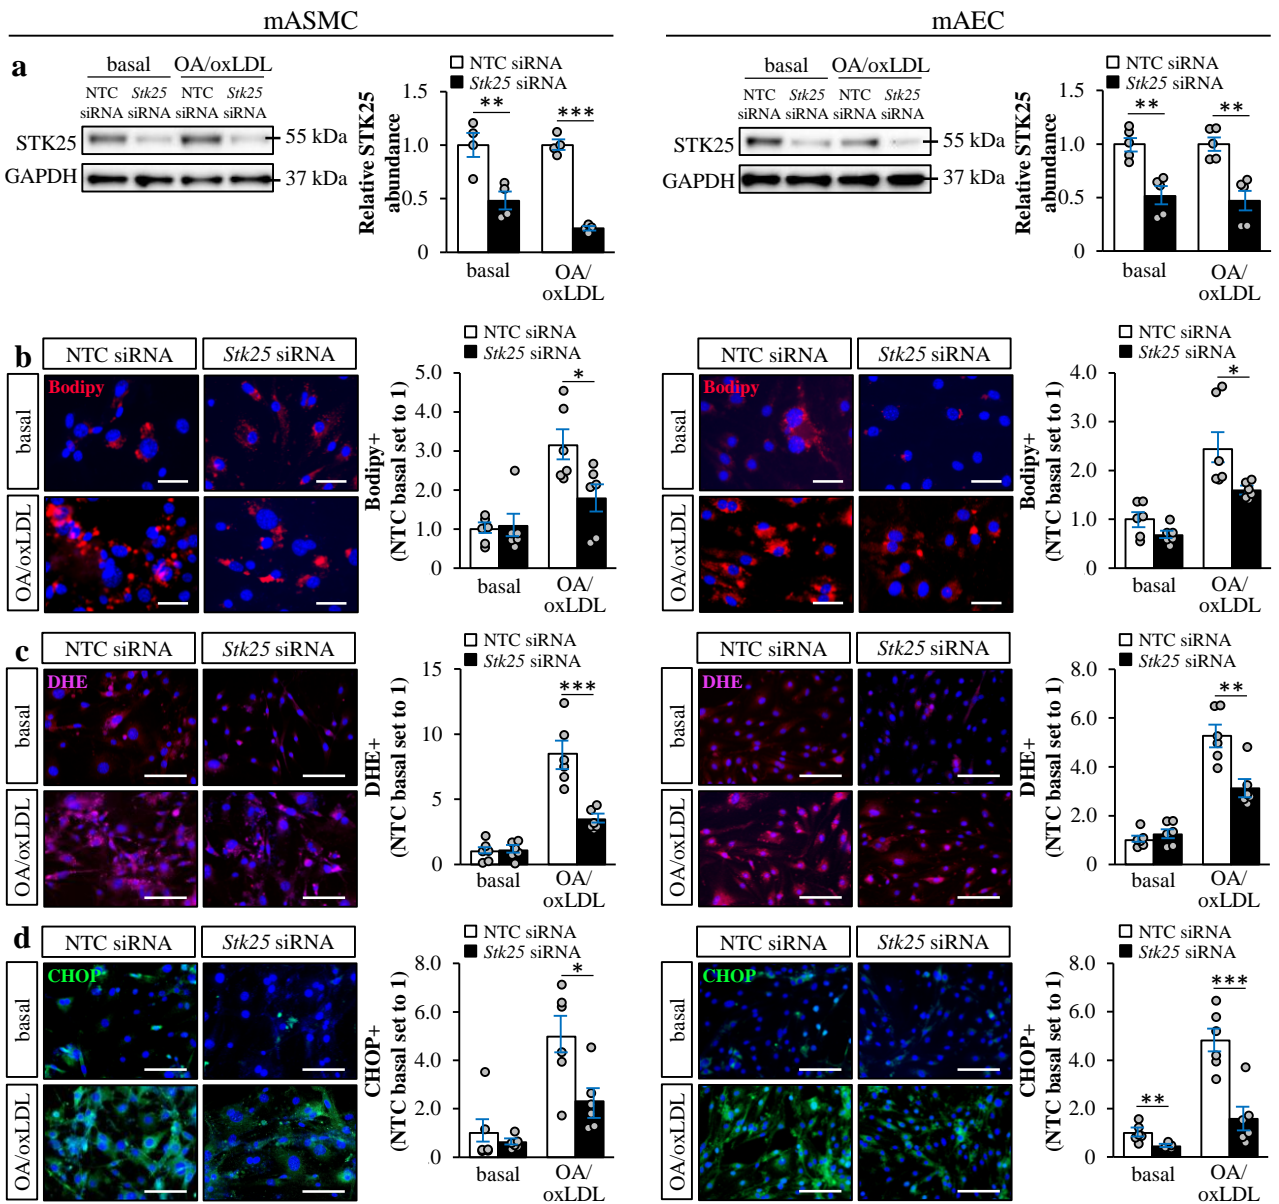

**Supplementary Fig. 3.** Silencing of STK25 suppresses lipid accumulation and oxidative and ER stress in mouse aortic endothelial and smooth muscle cells. mASMCs and mAECs were transfected with *Stk25* siRNA or NTC siRNA. (a) STK25 protein abundance. Protein levels were analyzed by densitometry; representative Western blots are shown with GAPDH used as a loading control. (b-d) Representative images of cells stained with Bodipy (red) or DHE (pink) or processed for immunofluorescence with anti-CHOP (green) antibody; nuclei stained with DAPI (blue). Quantification of the staining. In (b) and (c-d), the scale bars represent 25 and 100  $\mu$ m, respectively. Data are mean  $\pm$  SEM from 4-6 wells per group. OA, oleic acid. \* $P < 0.05$ , \*\* $P < 0.01$ , \*\*\* $P < 0.001$  for *Stk25* siRNA vs. NTC siRNA

## Supplementary Figure 4

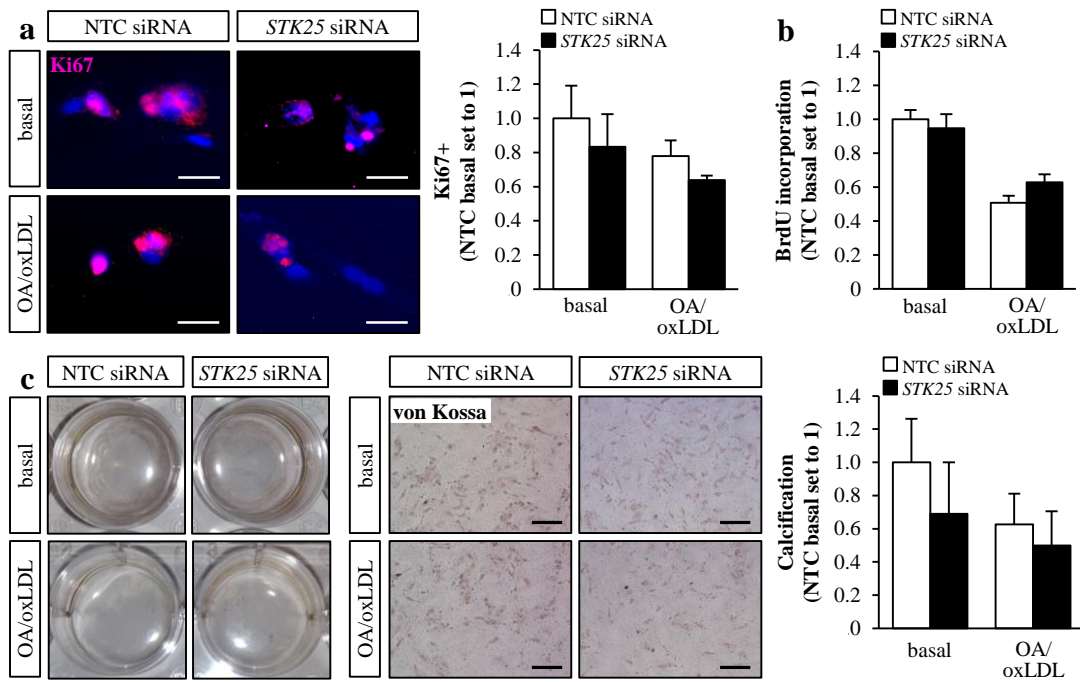

**Supplementary Fig. 4.** *STK25* does not control proliferation or calcification in human aortic endothelial cells. hAECs were transfected with *STK25* siRNA or NTC siRNA. (a) Representative images of cells processed for immunofluorescence with anti-Ki67 (pink) antibody; nuclei stained with DAPI (blue). Quantification of the staining. (b) Proliferation rate assessed by measuring the DNA synthesis using a Biotrack cell proliferation ELISA. (c) Representative images of calcium deposition. Quantification of the staining. In (a) and (c), the scale bars represent 25 and 50  $\mu$ m, respectively. Data are mean  $\pm$  SEM from 6-8 wells per group. OA, oleic acid

## Supplementary Figure 5

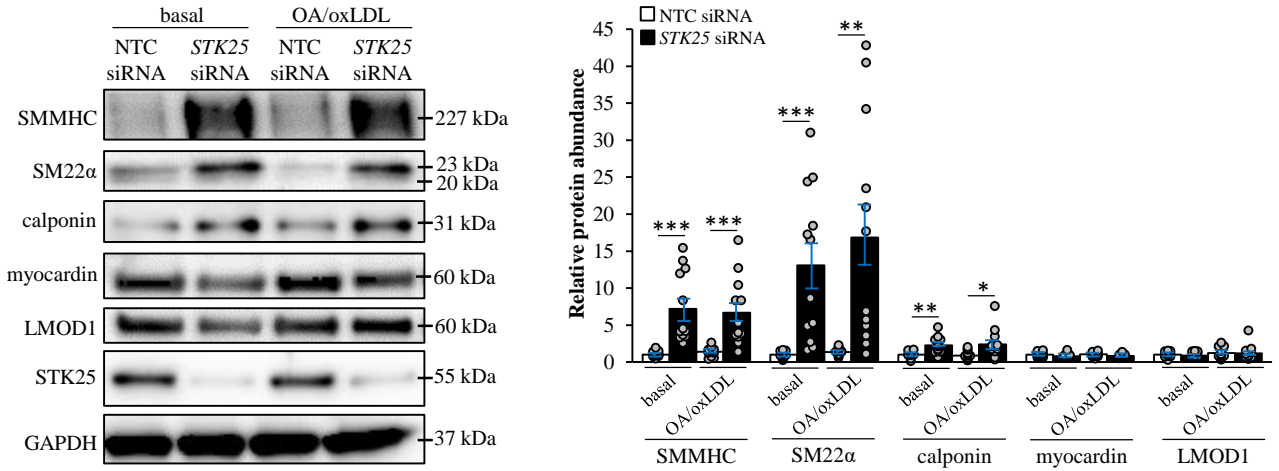

**Supplementary Fig. 5.** Silencing of STK25 increases the abundance of contractile markers in human aortic smooth muscle cells. hASMCs were transfected with *STK25* siRNA or NTC siRNA. Cell lysates were analyzed by Western blot using antibodies specific for SMMHC, SM22 $\alpha$ , calponin, myocardin, LMOD1, and STK25. Protein levels were analyzed by densitometry; representative Western blots are shown with GAPDH used as a loading control. Data are mean  $\pm$  SEM from 11-12 wells per group. OA, oleic acid. \* $P < 0.05$ , \*\* $P < 0.01$ , \*\*\* $P < 0.001$  for *STK25* siRNA vs. NTC siRNA

## Supplementary Figure 6

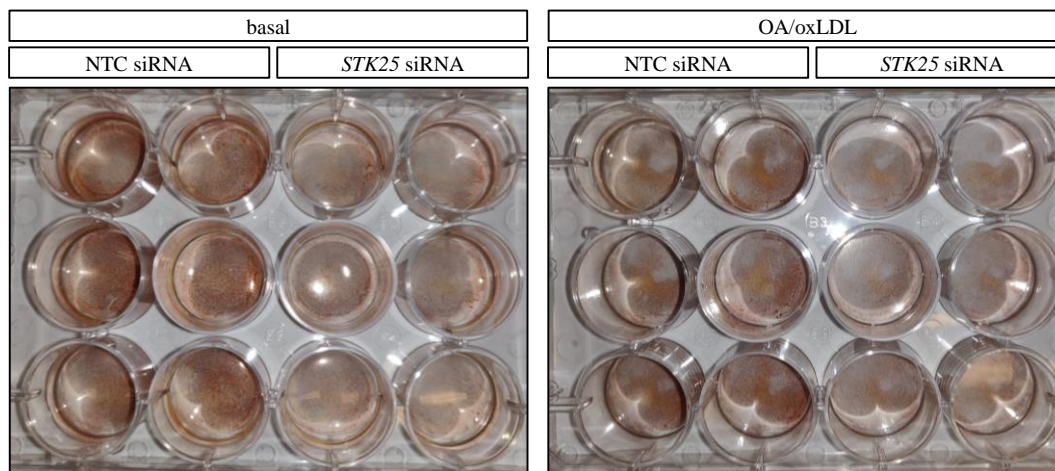

**Supplementary Fig. 6.** Silencing of *STK25* decreases calcification in human aortic smooth muscle cells. hASMCs were transfected with *STK25* siRNA or NTC siRNA. Representative images of cells incubated with silver nitrate and exposed to light. OA, oleic acid

## Supplementary Figure 7

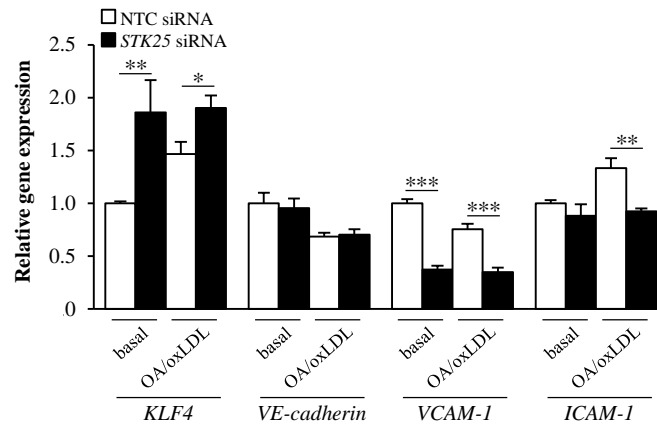

**Supplementary Fig. 7.** STK25 protects against dysfunctional changes in human aortic endothelial cells. hAECs were transfected with *STK25* siRNA or NTC siRNA. Gene expressions of selected markers of endothelial cell dysfunction. Data are mean  $\pm$  SEM from 6 wells per group. OA, oleic acid. \* $P < 0.05$ , \*\* $P < 0.01$ , \*\*\* $P < 0.001$  for *STK25* siRNA vs. NTC siRNA



## Supplementary Figure 8

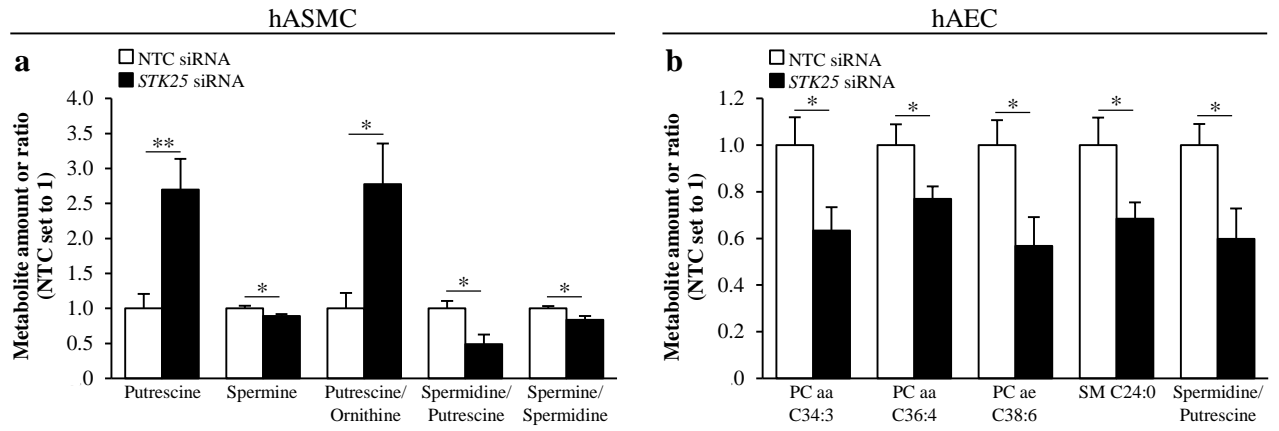

**Supplementary Fig. 8.** Silencing of *STK25* alters the concentration of polyamines in human aortic endothelial and smooth muscle cells. hASMCs and hAECs were transfected with *STK25* siRNA or NTC siRNA. Cellular metabolite levels and ratios were measured in hASMCs (a) and hAECs (b) using the AbsoluteIDQ p180 Kit. Significant differences are shown. Data are mean  $\pm$  SEM from 7-8 wells per group. \* $P < 0.05$ , \*\* $P < 0.01$  for *STK25* siRNA vs. NTC siRNA

## Supplementary Figure 9

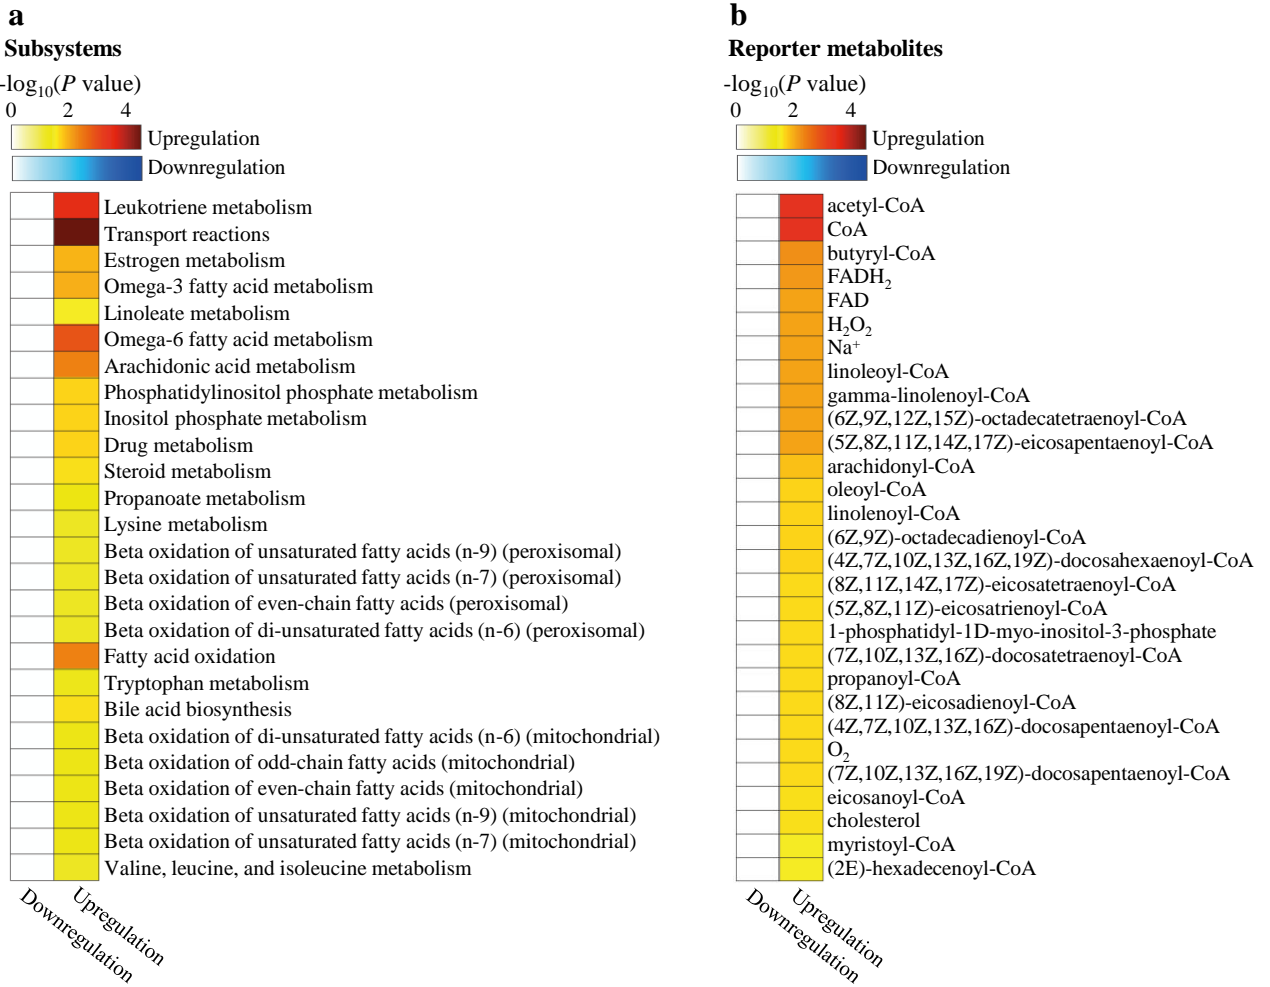

**Supplementary Fig. 9.** Enrichment analysis of subsystems and reporter metabolite sets was performed by integrative analysis of global phosphoproteomic data obtained from STK25-deficient hASMCs with the genome-scale metabolic model Human1.<sup>61</sup> Up- or downregulation ( $P < 0.05$ ) in subsystems (a) and reporter metabolite sets (b) in response to knockdown of STK25 are shown.

## Supplementary Figure 10

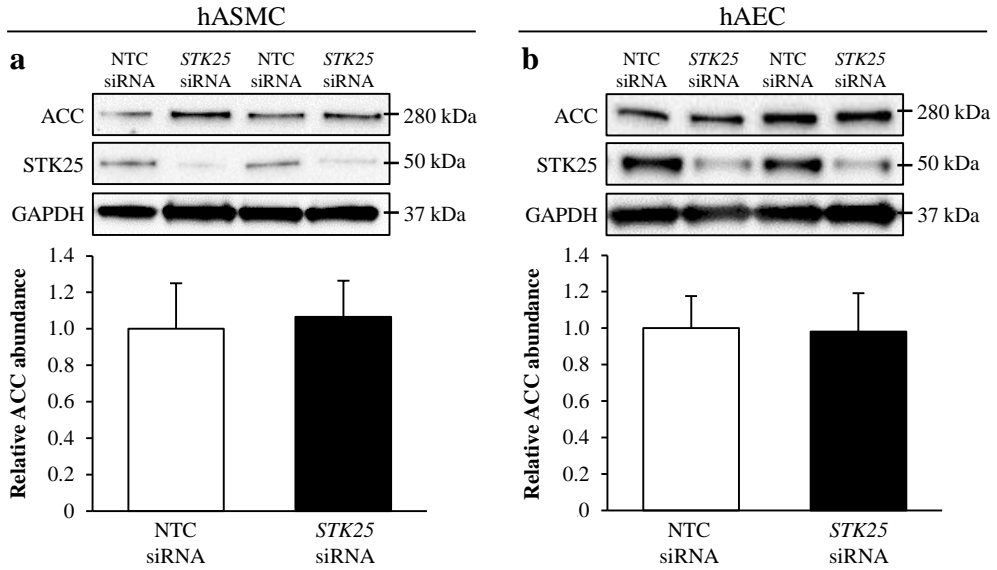

**Supplementary Fig. 10.** Silencing of STK25 does not affect the levels of ACC in human aortic endothelial and smooth muscle cells. hASMCs and hAECs were transfected with *STK25* siRNA or NTC siRNA. Cell lysates from hASMCs (a) and hAECs (b) were analyzed by Western blot using antibodies specific for ACC and STK25. Protein levels were analyzed by densitometry; representative Western blots are shown with GAPDH used as a loading control. Data are mean  $\pm$  SEM from 6-9 wells per group.

## Supplementary Figure 11

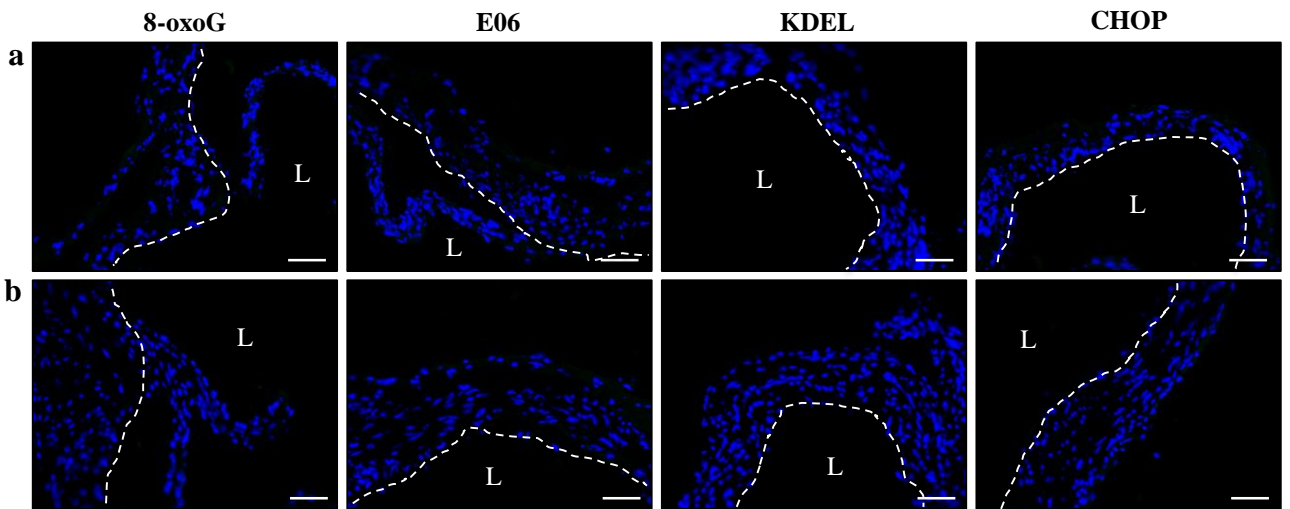

**Supplementary Fig. 11.** Representative negative control images for immunofluorescence analysis in sections of aortic sinus from atherosclerotic mice by excluding primary antibody (a) or by substituting a primary antibody by an equivalent concentration of the corresponding Ig isotype (b); nuclei stained with DAPI (blue). Dashed line and L indicate lumen. The scale bars represent 50 μm. L, lumen

## Supplementary Figure 12

### Figure 1b

1. NTC siRNA basal
2. *STK25* siRNA basal
3. NTC siRNA treated
4. *STK25* siRNA treated
5. NTC siRNA basal
6. *STK25* siRNA basal
7. NTC siRNA treated
8. *STK25* siRNA treated
9. NTC siRNA basal
10. *STK25* siRNA basal
11. NTC siRNA treated
12. *STK25* siRNA treated

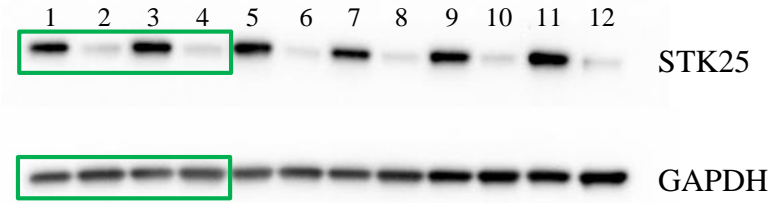

1. NTC siRNA basal
2. *STK25* siRNA basal
3. NTC siRNA treated
4. *STK25* siRNA treated
- 5-12. Experiment not related to this panel

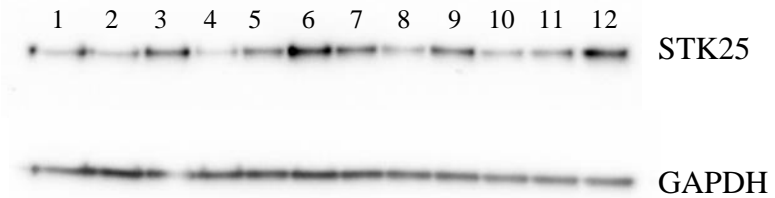

### Figure 1i

1. NTC siRNA basal
2. *STK25* siRNA basal
3. NTC siRNA treated
4. *STK25* siRNA treated
5. NTC siRNA basal
6. *STK25* siRNA basal
7. NTC siRNA treated
8. *STK25* siRNA treated
9. NTC siRNA basal
10. *STK25* siRNA basal
11. NTC siRNA treated
12. *STK25* siRNA treated

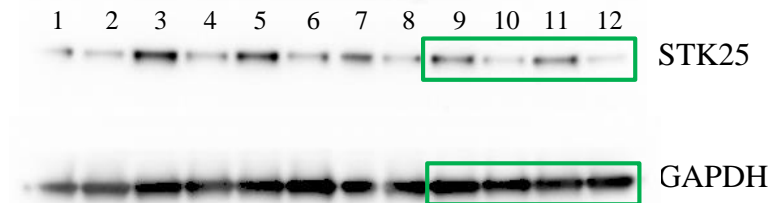

- 1-2. Experiment not related to this panel
7. NTC siRNA basal
8. *STK25* siRNA basal
9. NTC siRNA treated
10. *STK25* siRNA treated
- 11-12. Experiment not related to this panel

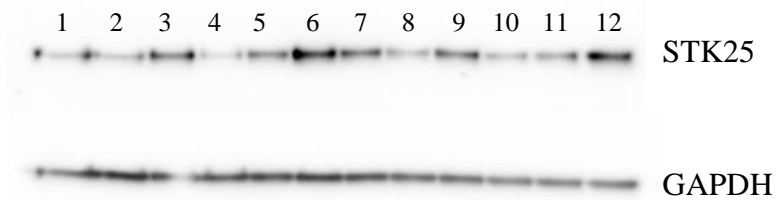

Green boxes indicates part shown in each respective figure

**Figure 2b**

1. NTC siRNA basal
2. *STK25* siRNA basal
3. NTC siRNA treated
4. *STK25* siRNA treated
5. NTC siRNA basal
6. *STK25* siRNA basal
7. NTC siRNA treated
8. *STK25* siRNA treated
9. NTC siRNA basal
10. *STK25* siRNA basal
11. NTC siRNA treated
12. *STK25* siRNA treated

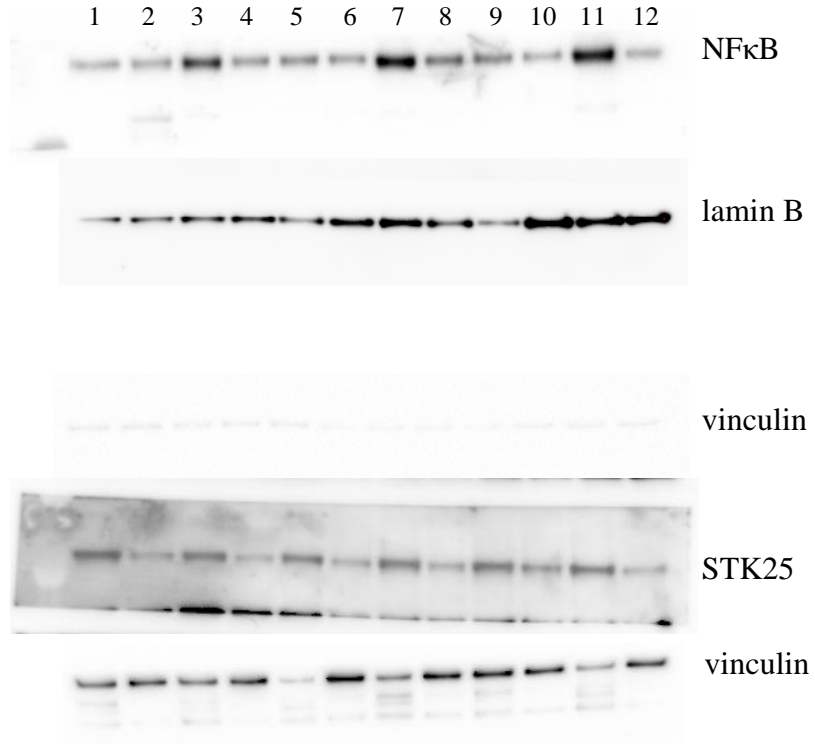

1. NTC siRNA basal
2. *STK25* siRNA basal
3. NTC siRNA treated
4. *STK25* siRNA treated
5. NTC siRNA basal
6. *STK25* siRNA basal
7. NTC siRNA treated
8. *STK25* siRNA treated
9. NTC siRNA basal
10. *STK25* siRNA basal
11. NTC siRNA treated
12. *STK25* siRNA treated

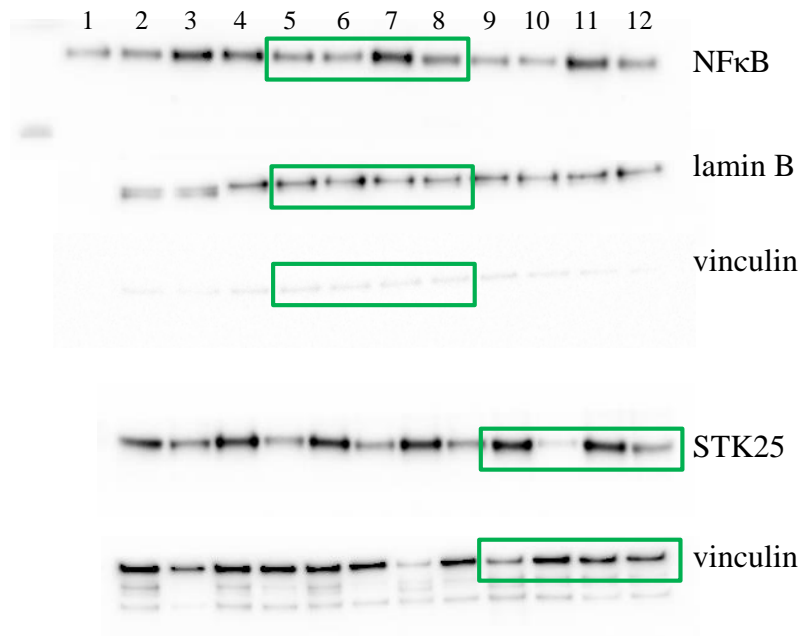

Green boxes indicates part shown in each respective figure

**Figure 2i**

1. NTC siRNA basal
2. *STK25* siRNA basal
3. NTC siRNA treated
4. *STK25* siRNA treated
5. NTC siRNA basal
6. *STK25* siRNA basal
7. NTC siRNA treated
8. *STK25* siRNA treated
9. NTC siRNA basal
10. *STK25* siRNA basal
11. NTC siRNA treated
12. *STK25* siRNA treated

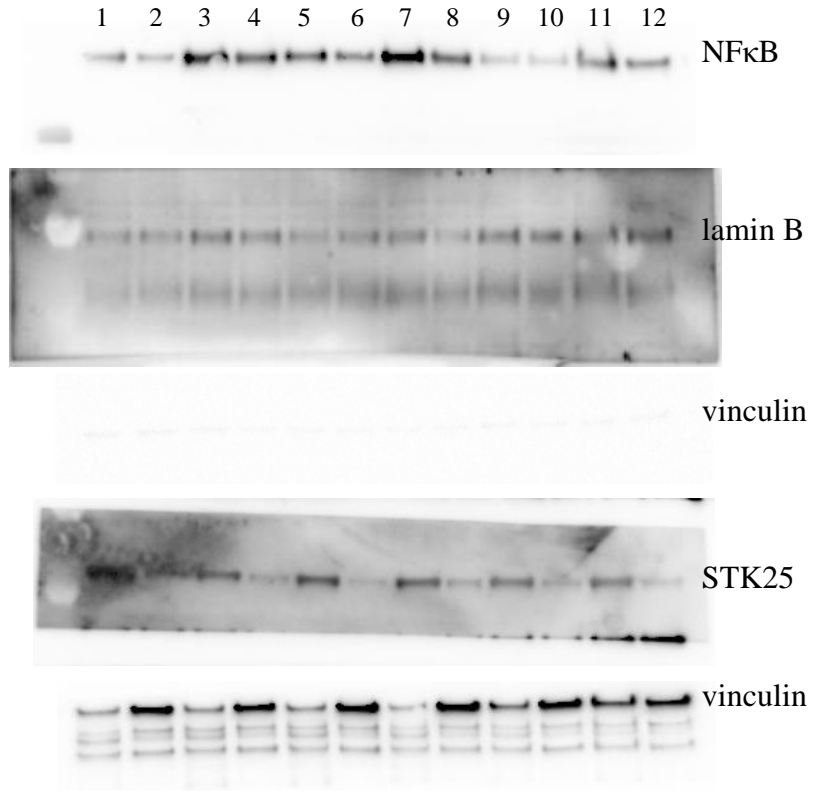

1. NTC siRNA basal
2. *STK25* siRNA basal
3. NTC siRNA treated
4. *STK25* siRNA treated
5. NTC siRNA basal
6. *STK25* siRNA basal
7. NTC siRNA treated
8. *STK25* siRNA treated
9. NTC siRNA basal
10. *STK25* siRNA basal
11. NTC siRNA treated
12. *STK25* siRNA treated

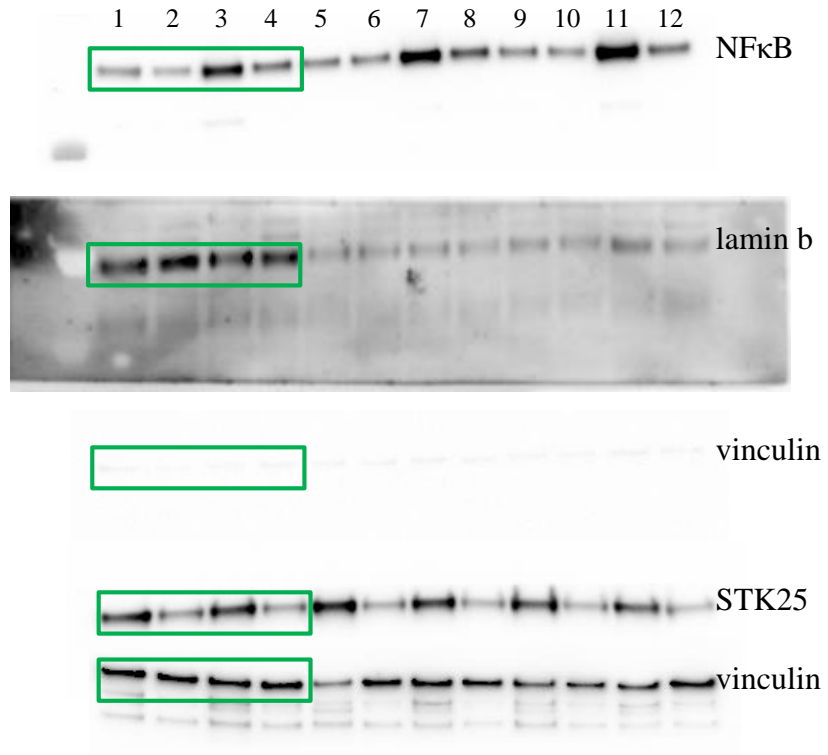

Green boxes indicates part shown in each respective figure

**Figure 6f**

1. NTC siRNA basal
2. *STK25* siRNA basal
3. NTC siRNA treated
4. *STK25* siRNA treated
5. NTC siRNA basal
6. *STK25* siRNA basal
7. NTC siRNA treated
8. *STK25* siRNA treated
9. NTC siRNA basal
10. *STK25* siRNA basal
11. NTC siRNA treated
12. *STK25* siRNA treated

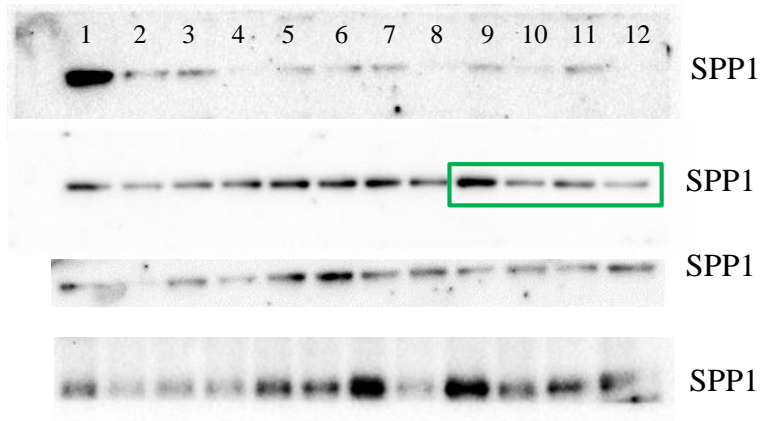

1. NTC siRNA basal
2. *STK25* siRNA basal
3. NTC siRNA treated
4. *STK25* siRNA treated
5. NTC siRNA basal
6. *STK25* siRNA basal
7. NTC siRNA treated
8. *STK25* siRNA treated
9. NTC siRNA basal
10. *STK25* siRNA basal
11. NTC siRNA treated
12. *STK25* siRNA treated

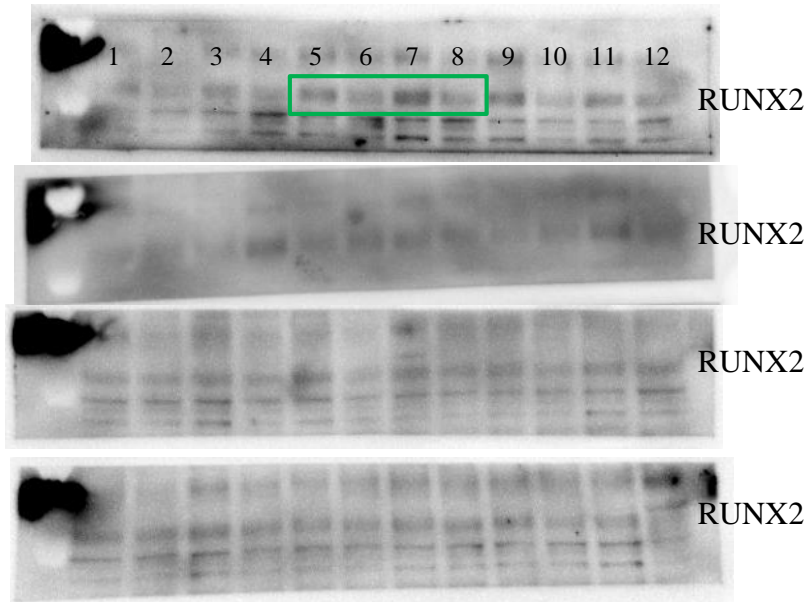

1. NTC siRNA basal
2. *STK25* siRNA basal
3. NTC siRNA treated
4. *STK25* siRNA treated
5. NTC siRNA basal
6. *STK25* siRNA basal
7. NTC siRNA treated
8. *STK25* siRNA treated
9. NTC siRNA basal
10. *STK25* siRNA basal
11. NTC siRNA treated
12. *STK25* siRNA treated

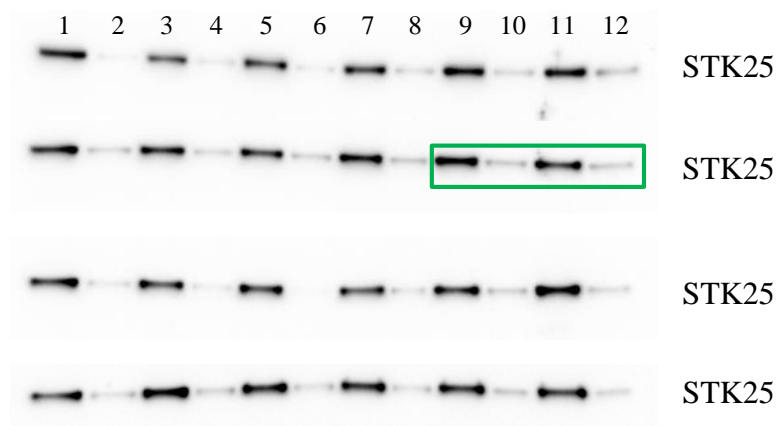

Green boxes indicates part shown in each respective figure



**Figure 6f cont.**

1. NTC siRNA basal
2. *STK25* siRNA basal
3. NTC siRNA treated
4. *STK25* siRNA treated
5. NTC siRNA basal
6. *STK25* siRNA basal
7. NTC siRNA treated
8. *STK25* siRNA treated
9. NTC siRNA basal
10. *STK25* siRNA basal
11. NTC siRNA treated
12. *STK25* siRNA treated

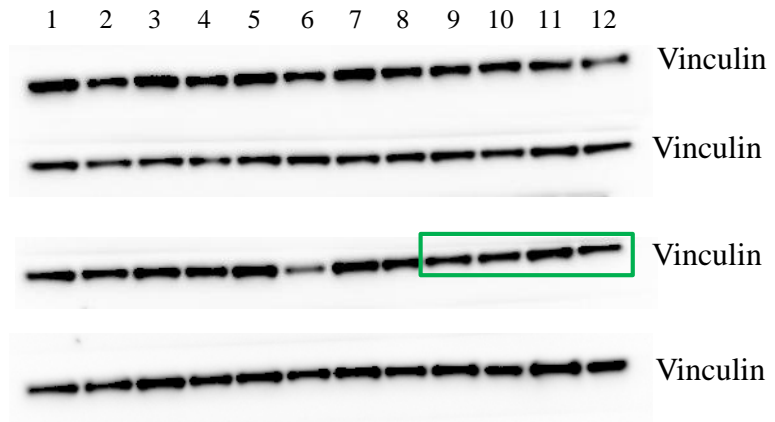

Green boxes indicates part shown in each respective figure

### Supplementary Figure 3a

1. mASMC NTC siRNA basal
2. mASMC *Stk25* siRNA basal
3. mASMC NTC siRNA treated
4. mASMC *Stk25* siRNA treated
5. mASMC NTC siRNA basal
6. mASMC *Stk25* siRNA basal
7. mASMC NTC siRNA treated
8. mASMC *Stk25* siRNA treated
9. mASMC NTC siRNA basal
10. mASMC *Stk25* siRNA basal
11. mASMC NTC siRNA treated
12. mASMC *Stk25* siRNA treated

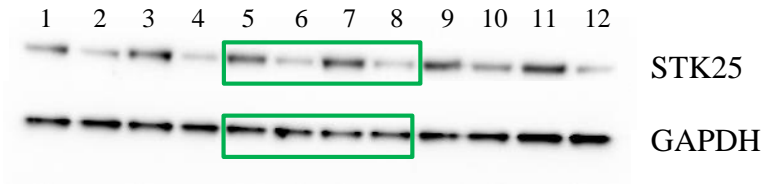

1. mASMC NTC siRNA basal
2. mASMC *Stk25* siRNA basal
3. mASMC NTC siRNA treated
4. mASMC *Stk25* siRNA treated
5. mAEC NTC siRNA basal
6. mAEC *Stk25* siRNA basal
7. mAEC NTC siRNA treated
8. mAEC *Stk25* siRNA treated
9. mAEC NTC siRNA basal
10. mAEC *Stk25* siRNA basal
11. mAEC NTC siRNA treated
12. mAEC *Stk25* siRNA treated

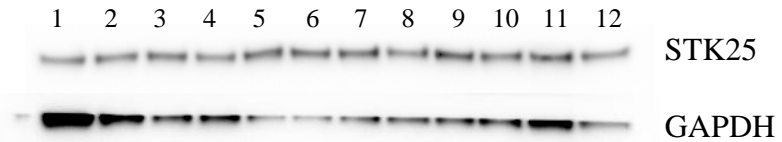

1. mAEC NTC siRNA basal
2. mAEC *Stk25* siRNA basal
3. mAEC NTC siRNA treated
4. mAEC *Stk25* siRNA treated
5. mAEC NTC siRNA basal
6. mAEC *Stk25* siRNA basal
7. mAEC NTC siRNA treated
8. mAEC *Stk25* siRNA treated
9. mAEC NTC siRNA basal
10. mAEC *Stk25* siRNA basal
11. mAEC NTC siRNA treated
12. mAEC *Stk25* siRNA treated

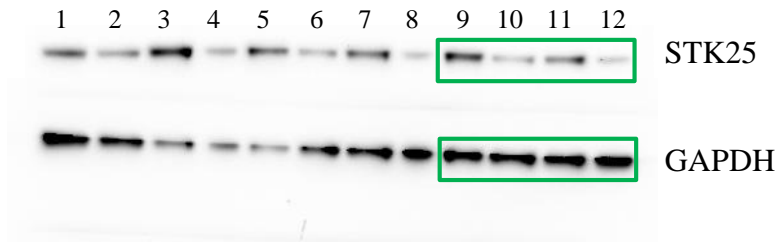

Green boxes indicates part shown in each respective figure

## Supplementary Figure 5

1. NTC siRNA basal
2. *STK25* siRNA basal
3. NTC siRNA treated
4. *STK25* siRNA treated
5. NTC siRNA basal
6. *STK25* siRNA basal
7. NTC siRNA treated
8. *STK25* siRNA treated
9. NTC siRNA basal
10. *STK25* siRNA basal
11. NTC siRNA treated
12. *STK25* siRNA treated

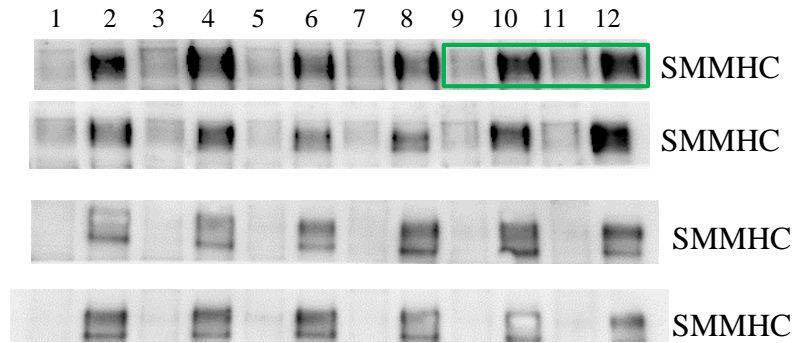

1. NTC siRNA basal
2. *STK25* siRNA basal
3. NTC siRNA treated
4. *STK25* siRNA treated
5. NTC siRNA basal
6. *STK25* siRNA basal
7. NTC siRNA treated
8. *STK25* siRNA treated
9. NTC siRNA basal
10. *STK25* siRNA basal
11. NTC siRNA treated
12. *STK25* siRNA treated

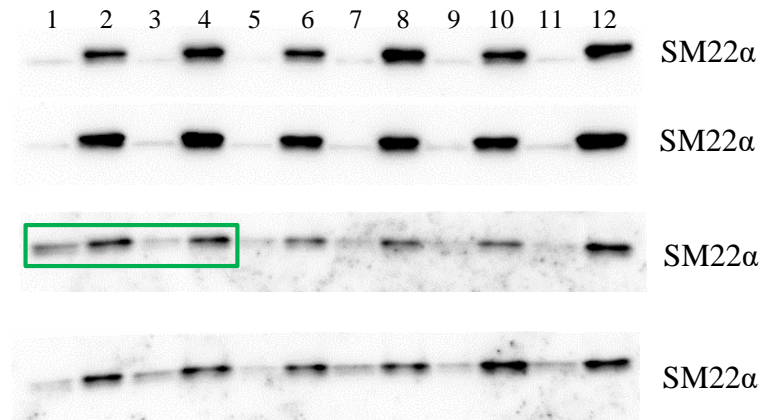

1. NTC siRNA basal
2. *STK25* siRNA basal
3. NTC siRNA treated
4. *STK25* siRNA treated
5. NTC siRNA basal
6. *STK25* siRNA basal
7. NTC siRNA treated
8. *STK25* siRNA treated
9. NTC siRNA basal
10. *STK25* siRNA basal
11. NTC siRNA treated
12. *STK25* siRNA treated

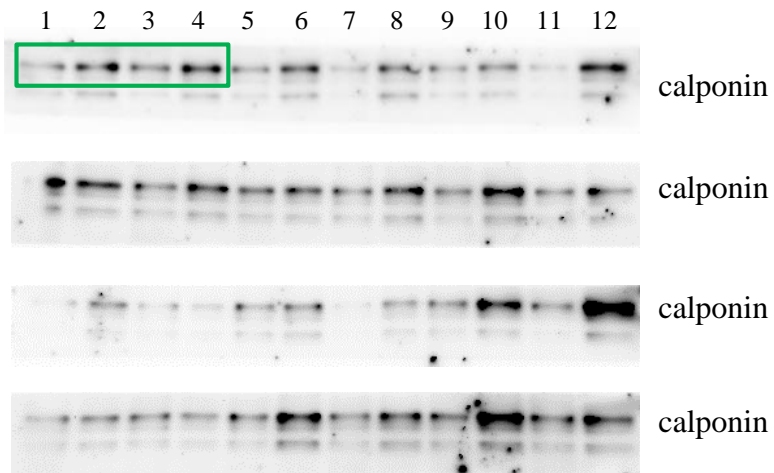

Green boxes indicates part shown in each respective figure

**Supplementary Figure 5 cont.**

1. NTC siRNA basal
2. *STK25* siRNA basal
3. NTC siRNA treated
4. *STK25* siRNA treated
5. NTC siRNA basal
6. *STK25* siRNA basal
7. NTC siRNA treated
8. *STK25* siRNA treated
9. NTC siRNA basal
10. *STK25* siRNA basal
11. NTC siRNA treated
12. *STK25* siRNA treated

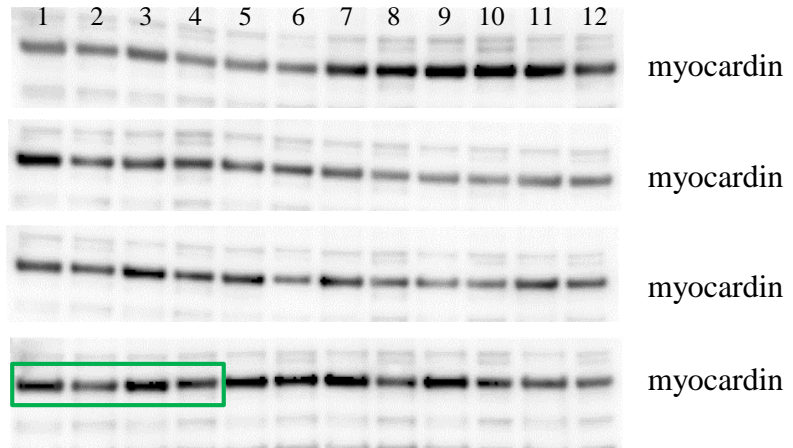

1. NTC siRNA basal
2. *STK25* siRNA basal
3. NTC siRNA treated
4. *STK25* siRNA treated
5. NTC siRNA basal
6. *STK25* siRNA basal
7. NTC siRNA treated
8. *STK25* siRNA treated
9. NTC siRNA basal
10. *STK25* siRNA basal
11. NTC siRNA treated
12. *STK25* siRNA treated

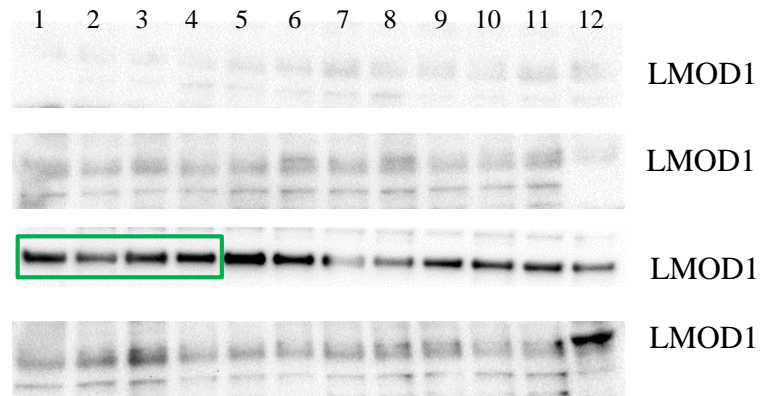

1. NTC siRNA basal
2. *STK25* siRNA basal
3. NTC siRNA treated
4. *STK25* siRNA treated
5. NTC siRNA basal
6. *STK25* siRNA basal
7. NTC siRNA treated
8. *STK25* siRNA treated
9. NTC siRNA basal
10. *STK25* siRNA basal
11. NTC siRNA treated
12. *STK25* siRNA treated

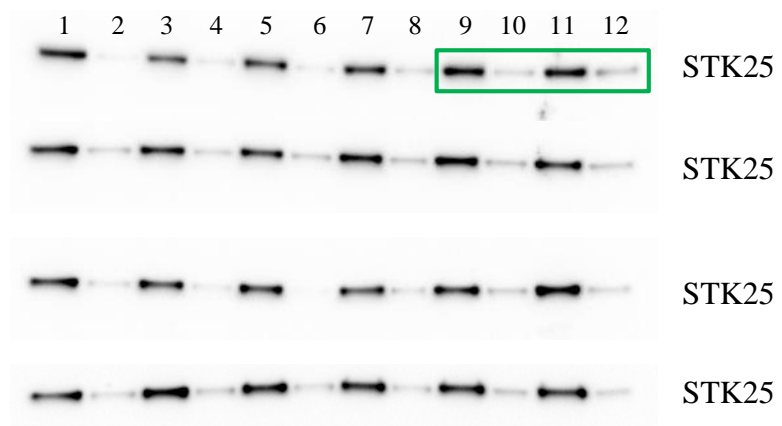

Green boxes indicates part shown in each respective figure

## Supplementary Figure 5 cont.

1. NTC siRNA basal
2. *STK25* siRNA basal
3. NTC siRNA treated
4. *STK25* siRNA treated
5. NTC siRNA basal
6. *STK25* siRNA basal
7. NTC siRNA treated
8. *STK25* siRNA treated
9. NTC siRNA basal
10. *STK25* siRNA basal
11. NTC siRNA treated
12. *STK25* siRNA treated

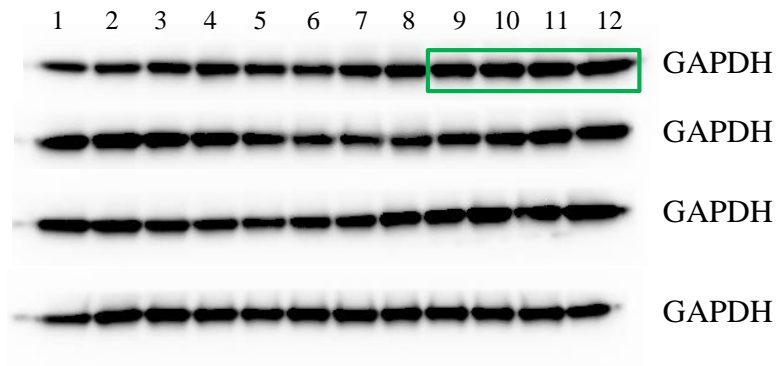

Green boxes indicates part shown in each respective figure

## Supplementary Figure 10a

- 1-2. NTC siRNA
- 3-4. *STK25* siRNA
- 5-6. NTC siRNA
- 7-8. *STK25* siRNA
- 9-10. NTC siRNA
- 11-12. *STK25* siRNA

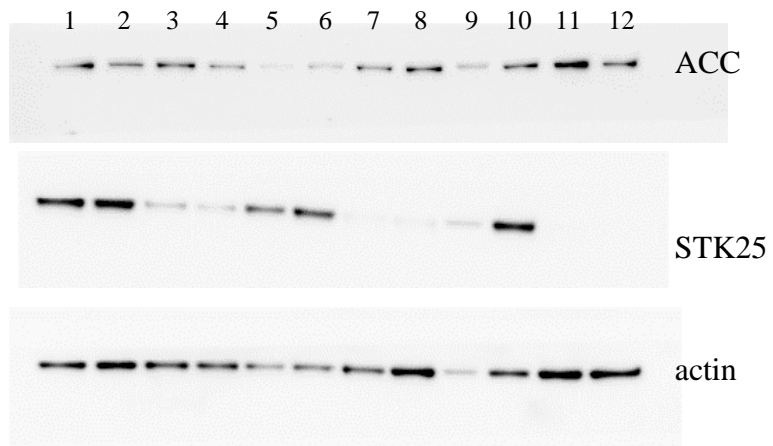

- 1. NTC siRNA
- 2. *STK25* siRNA
- 3. NTC siRNA
- 4. *STK25* siRNA
- 5. NTC siRNA
- 6. *STK25* siRNA

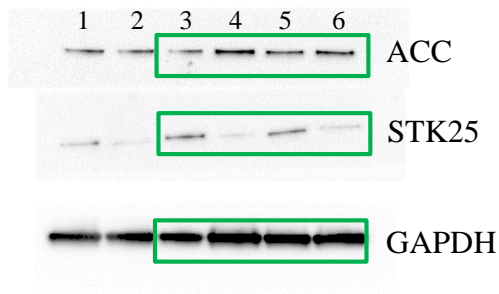

## Supplementary Figure 10b

- 1. NTC siRNA
- 2. *STK25* siRNA
- 3. NTC siRNA
- 4. *STK25* siRNA
- 5. NTC siRNA
- 6. *STK25* siRNA
- 7. NTC siRNA
- 8. *STK25* siRNA
- 9. NTC siRNA
- 10. *STK25* siRNA
- 11. NTC siRNA
- 12. *STK25* siRNA

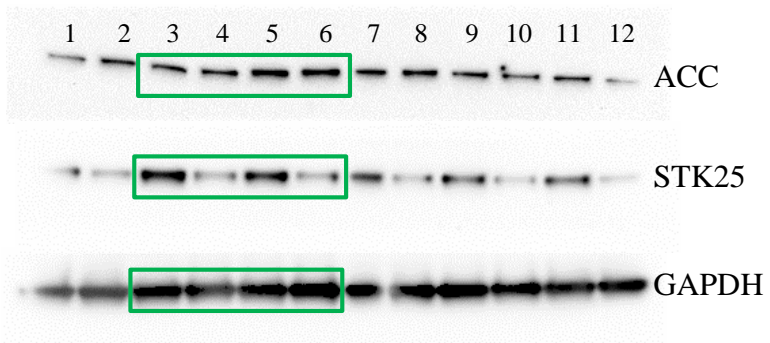

Green boxes indicates part shown in each respective figure

**Supplementary Table 1.** List of antibodies used for Western blot and immunofluorescence analysis

| Type                               | Antibody name and catalogue number               | Working dilution | Company                                   |
|------------------------------------|--------------------------------------------------|------------------|-------------------------------------------|
| Primary antibodies                 | anti-STK25 (25821-1-AP)                          | 1:750            | Proteintech (Chicago, IL)                 |
|                                    | anti-GAPDH (sc-47724)                            | 1:1000           | Santa Cruz Biotechnology (Santa Cruz, CA) |
|                                    | anti-NFκB (ab16502)                              | 1:500            | Abcam (Cambridge, UK)                     |
|                                    | anti-lamin B (ab229025)                          | 1:1000           | Abcam                                     |
|                                    | anti-vinculin (sc-25336)                         | 1:1000           | Santa Cruz Biotechnology                  |
|                                    | anti-8-oxoG (ab62623)                            | 1:200            | Abcam                                     |
|                                    | anti-E06 (J0914)                                 | 1:100            | Avanti Polar Lipids, Inc. (Alabaster, AL) |
|                                    | anti-KDEL (ab176333)                             | 1:1000           | Abcam                                     |
|                                    | anti-CHOP (MA1-250)                              | 1:200            | Invitrogen (Waltham, MA)                  |
|                                    | anti-Ki67 (14-5698-82)                           | 1:200            | Invitrogen                                |
|                                    | anti-SMMHC (ab125884)                            | 1:1000           | Abcam                                     |
|                                    | anti-SM22α (PA5-29767)                           | 1:1000           | Invitrogen                                |
|                                    | anti-calponin (MA5-11620)                        | 1:1000           | Invitrogen                                |
|                                    | anti-myocardin (SAB4200539)                      | 1:1000           | Sigma-Aldrich (St. Louis, MO)             |
|                                    | anti-LMOD1 (HPA028325)                           | 1:1000           | Sigma Aldrich                             |
|                                    | anti-SPP1 (PA5-34579)                            | 1:1000           | Invitrogen                                |
|                                    | anti-RUNX2 (ab23981)                             | 1:500            | Abcam                                     |
|                                    | anti-ACC (#3662)                                 | 1:1000           | Cell Signaling Technology (Boston, MA)    |
|                                    | Mouse IgG2b Isotype Control (14-4732-82)         | 1:100            | Invitrogen                                |
|                                    | Mouse IgM Isotype Control (14-4752-81)           | 1:67             | Invitrogen                                |
| Rabbit IgG Isotype Control (31235) | 1:24000                                          | Invitrogen       |                                           |
| Secondary antibodies               | Donkey anti-mouse IgG, Alexa Fluor 488 (A21202)  | 1:500            | Invitrogen                                |
|                                    | Goat anti-rabbit IgG, Alexa Fluor 488 (A11008)   | 1:500            | Invitrogen                                |
|                                    | Donkey anti-rabbit IgG, Alexa Fluor 594 (A21207) | 1:500            | Invitrogen                                |
|                                    | Goat anti-mouse IgG, Alexa Fluor 594 (A11005)    | 1:500            | Invitrogen                                |
|                                    | Goat anti-rat IgG, Alexa Fluor 594 (A11007)      | 1:500            | Invitrogen                                |
|                                    | Goat anti-rabbit IgG, HRP-linked (#7074)         | 1:1000           | Cell Signaling Technology                 |
|                                    | Horse anti-mouse IgG, HRP-linked (#7076)         | 1:1000           | Cell Signaling Technology                 |

**Supplementary Table 2.** Differential regulation of the total protein abundance in hASMCs transfected with NTC or *STK25* siRNA and treated with oleic acid and oxLDL for 24 hours

| Accession number | Symbol   | Name                                         | <i>P</i> value | Ratio | Function                                                                                                                                                                                                                                                                        |
|------------------|----------|----------------------------------------------|----------------|-------|---------------------------------------------------------------------------------------------------------------------------------------------------------------------------------------------------------------------------------------------------------------------------------|
| P02788           | LTF      | Lactotransferrin                             | 0.004          | -1.87 | Lactoferrin (EC 3.4.21) is an iron-binding glycoprotein of the transferrin family that is expressed in most biologic fluids and is a major component of mammals' innate immune system. It has also been shown to increase bone formation.                                       |
| P02771           | AFP      | Alpha-fetoprotein                            | 0.001          | -1.72 | The AFP gene is a member of a multigenic family that comprises the related genes encoding albumin, afamin, and vitamin D-binding protein. It is involved in proliferation and is increased in several types of cancers.                                                         |
| P02768           | ALB      | Albumin                                      | 0.002          | -1.71 | Albumin is the major protein of the blood plasma, supporting the oncotic pressure. It is also an important circulating antioxidant and possesses enzymatic properties.                                                                                                          |
| P26022           | PTX3     | Pentraxin-related protein PTX3               | 1.2E-5         | -1.67 | PTX3, the prototypic long pentraxin, is a soluble pattern recognition receptor activated by cytokines, that is involved in the regulation of innate resistance to pathogens and inflammatory reactions. It has been suggested as a biomarker for inflammatory vascular disease. |
| P02765           | AHSG     | Alpha-2-HS-glycoprotein                      | 0.005          | -1.65 | The AHSG gene encodes a multifunctional phosphorylated extracellular glycoprotein that has an important role in inhibition of vascular calcium deposition. It also promotes endocytosis, possesses opsonic properties and influences the mineral phase of bone.                 |
| P02774           | DBP      | Vitamin D-binding protein                    | 0.002          | -1.62 | DPB (EC 6.3.1.5) is a transcriptional activator recognizes and binds to promoters of genes such as albumin. The major function of DBP is binding, solubilization, and transport of vitamin D and its metabolites.                                                               |
| P05543           | SERPINA7 | Thyroxine-binding globulin                   | 0.002          | -1.60 | The SERPINA7 gene is a member of the serpin gene family. SERPINA7 [thyroxine-binding globulin (TBG)] is the major thyroid hormone transport protein in serum.                                                                                                                   |
| Q9BZI7           | UPF3B    | Regulator of nonsense transcripts 3B         | 0.002          | -1.60 | UPF3B is a component of an exon-junction complex that promotes nonsense-mediated decay, which is a mechanism for degrading transcripts with premature termination codons arising from errors in transcription or splicing.                                                      |
| P61599           | NAA20    | N-alpha-acetyltransferase 20                 | 0.003          | -1.57 | NAA20 (EC 2.3.1.254) is a component of N-acetyltransferase complex B, involved in regulation of cell proliferation and cellular migration.                                                                                                                                      |
| Q9NQS7           | INCENP   | Inner centromere protein                     | 0.004          | -1.54 | INCENP is a component of the chromosome passenger complex, a complex that acts as a key regulator of mitosis, and is also involved in regulating cell proliferation.                                                                                                            |
| P19823           | ITIH2    | Inter-alpha-trypsin inhibitor heavy chain H2 | 2.0E-5         | -1.54 | The inter-alpha-trypsin inhibitors are a family of structurally related plasma serine protease inhibitors involved in extracellular matrix stabilization and in prevention of tumor metastasis.                                                                                 |
| Q15283           | RASA2    | Ras GTPase-activating protein 2              | 0.0007         | 1.52  | Ras signaling is involved in several cellular processes. RASA2 hydrolyze GTP to GDP on Ras and thereby inactivating it, which leads to decreased proliferation and differentiation.                                                                                             |
| P35443           | THBS4    | Thrombospondin-4                             | 0.04           | -1.52 | The thrombospondins are a family of extracellular calcium binding proteins involved in cell proliferation, adhesion, and migration.                                                                                                                                             |
| P49747           | COMP     | Cartilage oligomeric matrix protein          | 0.002          | -1.51 | COMP is a pentameric extracellular matrix protein that catalyzes the assembly of collagens and promotes formation of well-defined fibrils.                                                                                                                                      |
| Q9NSY0           | NRBP2    | Nuclear receptor-binding protein 2           | 0.005          | -1.50 | NRBP2 is considered an autophagy-related gene, and may regulate apoptosis of neural progenitor cells during their differentiation. It has been shown to regulate cell proliferation and migration.                                                                              |



| Accession number | Symbol   | Name                                       | P value | Ratio | Gene function                                                                                                                                                                                                                                                                                                        |
|------------------|----------|--------------------------------------------|---------|-------|----------------------------------------------------------------------------------------------------------------------------------------------------------------------------------------------------------------------------------------------------------------------------------------------------------------------|
| P05121           | SERPINE1 | Plasminogen activator inhibitor 1          | 8.7E-7  | -1.49 | The SERPINE1 gene is a member of the serpin gene family. SERPINE1 (PAI1) inhibits the conversion of plasminogen into plasmin, which breaks down fibrin clots. Thus, SERPINE1 negatively regulates fibrinolysis and impairs the dissolution of clots. It has also been shown to regulate migration and proliferation. |
| P23677           | ITPKA    | Inositol-trisphosphate 3-kinase A          | 0.03    | -1.49 | ITPKA (EC 2.7.1.127) catalyzes the phosphorylation of Ins(1,4,5)P3 to Ins(1,3,4,5)P4, both of which are modulators of calcium homeostasis. ITPKA has been linked to migration via its binding to actin.                                                                                                              |
| P01009           | SERPINA1 | Alpha-1-antitrypsin                        | 0.003   | -1.47 | The SERPINA1 gene is a member of the serpin gene family. The SERPINA1 gene encodes alpha-1-antitrypsin. It is known to decrease coagulation time and has proteolytic activity against insulin and plasmin, but it has also been shown to regulate migration.                                                         |
| Q96QB1           | DLC1     | Rho GTPase-activating protein 7            | 1.6E-6  | 1.46  | RhoGAPs are GTPase activating proteins. DLC1 is a RhoGAP that is regulating cell proliferation, adhesion, and migration. It's known to be a tumor suppressor.                                                                                                                                                        |
| P20742           | PZP      | Pregnancy zone protein                     | 0.004   | -1.44 | PZP is a protease inhibitor and one of the major pregnancy-associated plasma proteins. PZP is believed to play a role in immune-regulation, but the specific biological significance of PZP is yet to be determined.                                                                                                 |
| Q96IF1           | AJUBA    | LIM domain-containing protein ajuba        | 0.0002  | 1.44  | AJUBA contribute to cell fate determination via regulation of the Hippo pathway and control cell proliferation and differentiation.                                                                                                                                                                                  |
| Q15048           | LRRC14   | Leucine-rich repeat-containing protein 14  | 0.003   | -1.43 | Members of the LRRC superfamily are diverse in respect to their structure and are involved via protein-protein interactions in a variety of functions including DNA repair, chromosomal stability and heart development. It is known to negatively regulate Toll-like receptor-mediated NFκB signaling.              |
| P00450           | CP       | Ceruloplasmin                              | 0.01    | -1.43 | Ceruloplasmin (EC 1.16.3.1) is a plasma metalloprotein involved in iron homeostasis. It has been shown to enhance LDL oxidation and decreases nitric oxide NO bioavailability through nitric oxidase activity.                                                                                                       |
| P36955           | SERPINF1 | Pigment epithelium-derived factor          | 0.0004  | -1.42 | The SERPINF1 gene is a member of the serpin gene family and encodes PEDF. PEDF has a variety of functions including proliferation and inhibition of angiogenesis.                                                                                                                                                    |
| Q2NKX8           | ERCC6L   | DNA excision repair protein ERCC-6-like    | 0.004   | -1.42 | ERCC6L (EC 3.6.4.12) is a DNA helicase and an essential component of the spindle assembly checkpoint. It has been shown to stimulate cancer cell proliferation.                                                                                                                                                      |
| Q9H2F3           | HSD3B7   | 3 beta-hydroxysteroid dehydrogenase type 7 | 1.4E-5  | 1.41  | The 3-beta-HSD enzymatic system plays a crucial role in the biosynthesis of all classes of hormonal steroids. The HSD3B7 enzyme (EC 1.1.1.181) catalyzes two reactions required for the inversion of the 3-hydroxyl group of cholesterol to the 3-hydroxyl of bile acids.                                            |
| P04278           | SHBG     | Sex hormone-binding globulin               | 0.01    | -1.41 | SHBG functions as an androgen transport protein, but may also be involved in receptor mediated processes. It is specific for 5-alpha-dihydrotestosterone, testosterone, and 17-beta-estradiol, and regulates the plasma metabolic clearance rate of steroid hormones by controlling their plasma concentration.      |
| O00592           | PODXL    | Podocalyxin                                | 0.002   | 1.41  | PODXL is an adhesion protein involved in migration.                                                                                                                                                                                                                                                                  |
| O96028           | NSD2     | Histone-lysine N-methyltransferase NSD2    | 0.03    | -1.41 | NSD2 (EC 2.1.1.43) is a histone lysine methyltransferase functioning as a transcriptional regulator. By adding a methyl group to histones, histone methyltransferases can turn off the activity of certain genes.                                                                                                    |

A ratio of 1.4-fold serves as the threshold for differential regulation. The functions of the differentially expressed proteins were annotated according to Gene Ontology database,<sup>1</sup> NCBI OMIM and/or PubMed

**Supplementary Table 3.** Differential regulation of the phosphorylation pattern in hASMCs transfected with NTC or *STK25* siRNA and treated with oleic acid and oxLDL for 24 hours

| Accession number | Symbol | Name                                                                        | Phosphorylation site | P value | Ratio | Function                                                                                                                                                                                                                                                                                                                                  |
|------------------|--------|-----------------------------------------------------------------------------|----------------------|---------|-------|-------------------------------------------------------------------------------------------------------------------------------------------------------------------------------------------------------------------------------------------------------------------------------------------------------------------------------------------|
| P02452           | COL1A1 | Collagen alpha-1 chain                                                      | S1023*               | 5.6E-08 | 1.72  | Collagen is a protein that strengthens and supports many tissues in the body, including cartilage, bone, tendon, and skin. The COL1A1 gene produces a component of type I collagen.                                                                                                                                                       |
| Q9H6R7           | WDCP   | WD repeat and coiled-coil-containing protein                                | S690*                | 0.005   | -1.65 | The function of WDCP is still elusive, but it is known to be a fusion partner of anaplastic lymphoma kinase which is involved in chromosomal rearrangement and cancer development.                                                                                                                                                        |
| Q9Y6I9.2         | TEX264 | Testis-expressed protein 264                                                | S269*<br>S272*       | 0.03    | -1.65 | TEX264 is an ER-phagy receptor involved in ERAD and ER stress.                                                                                                                                                                                                                                                                            |
| O75477           | ERLIN1 | Erlin-1                                                                     | S336*                | 0.0001  | -1.55 | Component of the ERLIN1/ERLIN2 complex which mediates ERAD of inositol 1,4,5-trisphosphate receptors. It is also involved in regulation of cellular cholesterol homeostasis by regulation the SREBP signaling pathway.                                                                                                                    |
| P02452.6         | COL1A1 | Collagen alpha-1 chain                                                      | S363                 | 0.0005  | 1.55  | Collagen is a protein that strengthens and supports many tissues in the body, including cartilage, bone, tendon, and skin. The COL1A1 gene produces a component of type I collagen.                                                                                                                                                       |
| Q9NZ72           | STMN3  | Stathmin-3                                                                  | S50*                 | 0.0004  | 1.54  | STMN3 is involved in cytoskeleton dynamics where it exhibits microtubule-destabilizing activity.                                                                                                                                                                                                                                          |
| Q96EV8.2         | DTNBP1 | Dysbindin                                                                   | S316*<br>S321*       | 0.02    | -1.53 | Dysbindin is a component of the BLOC-1 complex, a complex that is required for normal biogenesis of lysosome-related organelles, such as platelet dense granules and melanosomes. In concert with the AP-3 complex, the BLOC-1 complex is required to target membrane protein cargos into vesicles assembled at cell bodies for delivery. |
| Q8TCJ2           | STT3B  | Dolichyl-diphosphooligosaccharide-protein glycosyltransferase subunit STT3B | S498*                | 0.003   | 1.53  | STT3B (EC 2.4.99.18) plays a role in the ERAD pathway that mediates ubiquitin-dependent degradation of misfolded endoplasmic reticulum proteins by mediating N-glycosylation of unfolded proteins, which are then recognized by the ERAD pathway and targeted for degradation.                                                            |
| O94888.1         | UBXN7  | UBX domain-containing protein 7                                             | S280*                | 0.005   | -1.52 | UBXN7 is a cofactor protein that provides a scaffold for different ubiquitin ligase complexes. It is known to decrease the levels of NRF2, an important transcription factor involved in protection against oxidative stress.                                                                                                             |
| Q8IWB9           | TEX2   | Testis-expressed protein 2                                                  | T742*                | 0.04    | -1.48 | Not much is known about TEX2, but it is suggested to be a ceramide transporter.                                                                                                                                                                                                                                                           |
| Q13111.2         | CHAF1A | Chromatin assembly factor 1 subunit A                                       | Position unknown     | 0.001   | -1.48 | A core component of the CAF-1 complex, a complex mediating chromatin assembly.                                                                                                                                                                                                                                                            |
| Q16658           | FSCN1  | Fascin                                                                      | S127*                | 0.0003  | 1.48  | Fascin is an actin-binding protein. It organizes filamentous actin into parallel bundles and plays a role in cell motility and migration.                                                                                                                                                                                                 |
| P02452.4         | COL1A1 | Collagen alpha-1 chain                                                      | S546*                | 0.0003  | 1.48  | Collagen is a protein that strengthens and supports many tissues in the body, including cartilage, bone, tendon, and skin. The COL1A1 gene produces a component of type I collagen.                                                                                                                                                       |

| Accession number  | Symbol   | Name                                                          | S558             | P value | Ratio | Function                                                                                                                                                                                                                                                                            |
|-------------------|----------|---------------------------------------------------------------|------------------|---------|-------|-------------------------------------------------------------------------------------------------------------------------------------------------------------------------------------------------------------------------------------------------------------------------------------|
| Q12797.1          | ASPH     | Aspartyl/asparaginyl beta-hydroxylase                         | S558             | 0.004   | 1.47  | ASPH (EC 1.14.11.16) belongs to the aspartyl/asparaginyl beta-hydroxylase family and specifically hydroxylates an Asp or Asn residue. It regulates epidermal growth factor-like domains of a number of proteins and controls calcium homeostasis.                                   |
| P23497.3          | SP100    | Nuclear autoantigen Sp-100                                    | T185             | 0.02    | -1.46 | SP100 is a transcriptional and chromatin regulatory factor mainly involved in inhibition of viral transcription.                                                                                                                                                                    |
| Q8IV32            | CCDC71   | Coiled-coil domain-containing protein 71                      | S208*            | 0.02    | -1.45 | The function of CCDC71 is still unknown.                                                                                                                                                                                                                                            |
| Q8IYB3.21         | SRRM1    | Serine/arginine repetitive matrix protein 1                   | S494*            | 0.003   | -1.45 | SRRM1 regulates alternative splicing and have been shown to be involved in proliferation and migration.                                                                                                                                                                             |
| Q53EP0.4          | FNDC3B   | Fibronectin type III domain-containing protein 3B             | S981             | 1.8E-06 | 1.45  | FNDC3B regulates the differentiation of adipocytes and osteoblasts and has been shown to regulate the proliferation and metastatic capacity of tumor cells.                                                                                                                         |
| Q13620;<br>Q13619 | CUL4B    | Cullin-4B                                                     | S468             | 9.9E-06 | 1.44  | The CUL4B gene encodes a scaffold protein of the cullin 4B-RING ubiquitin ligase (E3) complex that regulates degradation of cellular proteins. It has been shown to be involved in proliferation.                                                                                   |
| Q8WUH2            | TGFBRAP1 | Transforming growth factor-beta receptor-associated protein 1 | S854*            | 0.02    | -1.44 | This gene encodes a protein that binds to TGF- $\beta$ receptors and plays a role in TGF- $\beta$ signaling, which is involved in many cellular processes. The encoded protein acts as a chaperone in signaling downstream of TGF- $\beta$ .                                        |
| Q96EY5.1          | MVB12A   | Multivesicular body subunit 12A                               | S170*            | 0.03    | -1.43 | Component of the ESCRT-I complex, a regulator required for the sorting of endocytic ubiquitinated cargos into multivesicular bodies, and thereby controlling several cellular processes.                                                                                            |
| O60341.3          | KDM1A    | Lysine-specific histone demethylase 1A                        | S137*            | 0.048   | -1.43 | KDM1A (EC 1.14.99.66) is a histone demethylase. Histone demethylases are a family of enzymes that catalyze the removal of methyl groups from lysine and arginine residues on histone tails. It is involved in regulation of several cellular processes.                             |
| Q9Y2K7.2          | KDM2A    | Lysine-specific demethylase 2A                                | Position unknown | 0.048   | -1.43 | KDM2A (EC 1.14.11.27) is a histone demethylase. It is involved in regulation of several cellular processes. May also recognize and bind to some phosphorylated proteins and promote their ubiquitination and degradation.                                                           |
| Q9NYU1;<br>Q9NYU2 | UGGT2    | UDP-glucose:glycoprotein glucosyltransferase 2                | Position unknown | 0.0004  | 1.43  | UGGT2 (EC 2.4.1) recognizes glycoproteins with minor folding defects and recycles them back to the endoplasmic reticulum for refolding or degradation, thus providing quality control for protein folding in the ER.                                                                |
| Q9Y2U8.3          | LEMD3    | Inner nuclear membrane protein Man1                           | S556             | 1.5E-05 | 1.43  | LEMD3 is an integral protein of the inner nuclear membrane. It functions as a specific repressor of TGF- $\beta$ and BMP signaling through its interaction with the SMAD proteins.                                                                                                  |
| P24386            | CHM      | Rab proteins geranylgeranyltransferase component A 1          | Position unknown | 0.01    | 1.43  | The CHM gene encodes the component A of the Rab escort protein-1 which encodes a chaperone protein for the prenylation of Rab GTPases, which regulates intracellular vesicular trafficking, and thereby controls cellular processes such as adhesion, migration, and proliferation. |

| Accession number  | Symbol | Name                                                              | S196   | P value | Ratio | Function                                                                                                                                                                                                                                                                                        |
|-------------------|--------|-------------------------------------------------------------------|--------|---------|-------|-------------------------------------------------------------------------------------------------------------------------------------------------------------------------------------------------------------------------------------------------------------------------------------------------|
| Q8N3E9            | PLCD3  | 1-phosphatidylinositol 4,5-bisphosphate phosphodiesterase delta-3 | S196   | 0.0001  | 1.42  | PLCD3 (EC 3.1.4.11) hydrolyzes the phosphatidylinositol 4,5-bisphosphate to generate the two second messenger molecules diacylglycerol and inositol 1,4,5-trisphosphate, which mediate a wide variety of cellular stimuli.                                                                      |
| Q6ZRS2.5          | SRCAP  | Helicase SRCAP                                                    | S1859* | 0.007   | -1.42 | SRCAP (EC 3.6.1) is a catalytic component of a complex which mediates the ATP-dependent exchange of histone H2AZ/H2B dimers for nucleosomal H2A/H2B, leading to transcriptional regulation of selected genes by chromatin remodeling.                                                           |
| P45974.1          | USP5   | Ubiquitin carboxyl-terminal hydrolase 5                           | S785*  | 0.004   | -1.42 | USP5 (EC 3.4.19.12) is a protease involved in unanchored Lys-48-linked polyubiquitin disassembly. Cleaves linear and branched multiubiquitin polymers.                                                                                                                                          |
| Q71F23            | CENPU  | Centromere protein U                                              | T98*   | 0.006   | -1.41 | CENPU is a component of the CENPA-NAC complex, a complex that plays a central role in assembly of kinetochore proteins, mitotic progression and chromosome segregation.                                                                                                                         |
| Q96P11;<br>Q63ZY6 | NSUN5  | 28S rRNA (cytosine-C(5))-methyltransferase                        | S327*  | 0.002   | -1.41 | NSUN5 (EC 2.1.1) is a methyltransferase involved in several different cellular processes.                                                                                                                                                                                                       |
| P41970            | ELK3   | ETS domain-containing protein Elk-3                               | S396*  | 8.3E-05 | -1.41 | ELK3 is a transcription factor regulating the expression of many genes. Under basal conditions, ELK3 is a transcriptional repressor, which converts to a transcriptional activator in response to RAS/ERK signaling and is involved in cell migration, angiogenesis, and malignant progression. |
| Q96C24.1          | SYTL4  | Synaptotagmin-like protein 4                                      | S201*  | 0.049   | -1.41 | SYTL4, also known as granuphilin, is involved in intracellular membrane trafficking where it is known to assist in the docking of granules to the plasma membrane.                                                                                                                              |
| Q9H3G5            | CPVL   | Probable serine carboxypeptidase CPVL                             | S32    | 8.0E-06 | 1.41  | CPVL (EC 3.4.16) may be involved in the digestion of phagocytosed particles in the lysosome, participation in an inflammatory protease cascade, and trimming of peptides for antigen presentation.                                                                                              |

A ratio of 1.4-fold serves as the threshold for differential regulation. The functions of the differentially phosphorylated proteins were annotated according to Gene Ontology database,<sup>1</sup> NCBI OMIM and/or PubMed

\*Phosphosites annotated in PhosphoSitePlus<sup>2</sup>

## REFERENCES

- 1 Ashburner, M. et al. Gene ontology: tool for the unification of biology. The Gene Ontology Consortium. *Nat Genet* 25, 25-29, doi:10.1038/75556 (2000).
- 2 Hornbeck, P. V. et al. PhosphoSitePlus, 2014: mutations, PTMs and recalibrations. *Nucleic Acids Res* 43, D512-D520, doi:10.1093/nar/gku1267 (2015).
