# Supplementary material for: Silencing of STE20-type kinase STK25 in human aortic endothelial and smooth muscle cells is atheroprotective
Source: PubMed Central journal article supplement (PMC9018782; doi:10.1038/s42003-022-03309-9), 2022-04-19
Supplement: 42003_2022_3309_MOESM3_ESM.pdf [file 42003_2022_3309_MOESM3_ESM.pdf]

## Description of Additional Supplementary Files

**File name:** Supplementary Data 1

**Description:** Source data for the main figures.
